# Supplementary material for: Site-specific ion occupation in the selectivity filter causes voltage-dependent gating in a viral K+ channel
Source: PubMed Central journal article supplement (PMC6039446; doi:10.1038/s41598-018-28751-w), 2018-07-10
Supplement: 41598_2018_28751_MOESM1_ESM.pdf [file 41598_2018_28751_MOESM1_ESM.pdf]

## Supplementary Information to

### Site-specific ion occupation in the selectivity filter causes voltage-dependent gating in a viral K<sup>+</sup> channel

O. Rauh, U.P. Hansen, D.D. Scheub, G. Thiel and I. Schroeder

#### Supplementary Equations 1 and 2

$$I_{OF} = I_{true} \frac{k_{FO}}{k_{FO} + k_{OF}} \quad (S1)$$

$$I_{app} = I_{true} \frac{k_{FO}}{k_{FO} + k_{OF}} \cdot \frac{k_{MO}}{k_{MO} + k_{OM}} = I_{OF} \frac{k_{MO}}{k_{MO} + k_{OM}} \quad (S2)$$

#### Supplementary Equations 3 to 7: Detailed equations for the fit of the IV curves

The equations are given in detail for the model in Fig. 5a<sup>1</sup>. This cyclic model has five different states of ion occupancy. The open channel current can be calculated from the rate constants  $k_{ij}$  between these states. (The indices of the rate constants of the ion hopping models are given as numbers or by  $i,j$  if not specified, those of the gating process (Fig. 1d) by letters excluding  $i,j$ ). The equation for fitting measured IV curves has been set up with the so-called “arrow scheme”<sup>2</sup>. This algorithm makes the inherent pattern of rate equations obvious and thus enables an easy generation of flux equations:

$$I = \text{outward current} - \text{inward current} = e \frac{\left[ \begin{array}{cccccc} 1 & 2 & 3 & 4 & 5 & 1 \\ \rightarrow & \rightarrow & \rightarrow & \rightarrow & \rightarrow & \end{array} \right]^{-1} \left[ \begin{array}{cccccc} 1 & 2 & 3 & 4 & 5 & 1 \\ \leftarrow & \leftarrow & \leftarrow & \leftarrow & \leftarrow & \end{array} \right]}{D_1^{C5} + D_2^{C5} + D_3^{C5} + D_4^{C5} + D_5^{C5}} \quad (S3)$$

$e$  is the unit charge, the numbers 1-5 represent the states in the ion-hopping model (Fig. 5a). An arrow between the numbers  $i$  and  $j$  stands for the rate constant  $k_{ij}$  or  $k_{ji}$  depending on the direction of the arrow. Each row in square brackets gives the product of the rate constants. The matrices  $D_i^{C5}$  (C5 means “cyclic 5-state model”) are defined as follows

$$D_1^{C5} = \left[ \begin{array}{cccccc} 1 & 2 & 3 & 4 & 5 & 1 \\ & \rightarrow & \rightarrow & \rightarrow & \rightarrow & \\ \leftarrow & & \rightarrow & \rightarrow & \rightarrow & \\ \leftarrow & \leftarrow & & \rightarrow & \rightarrow & \\ \leftarrow & \leftarrow & \leftarrow & & \rightarrow & \\ \leftarrow & \leftarrow & \leftarrow & \leftarrow & & \end{array} \right] = \sum_{m=1}^5 \prod_{i=2}^m k_{i,i-1} \prod_{j=m+1}^5 k_{j,j+1} \quad (S4)$$

The rate constants in a row represented by an arrow are multiplied, and the products of each row are added. The indices are cyclic, i.e., the index following 5 is not 6, but 1. For the matrices  $D_2^{cs}$  to  $D_5^{cs}$ , the indices are rotated starting with the subscript of the matrix. For details, see ref.<sup>2</sup>. Ion activities  $a_K$  (instead of concentrations, see Supplementary Table S1) are inserted into the binding reactions by

$$k_{12} = k_{12,1} \cdot a_{Kin} \quad (S5a)$$

$$k_{54} = k_{54,1} \cdot a_{Kout} \quad (S5b)$$

The rate constants with index “1” are the rate constants for  $a_K = 1$  mM. The rather large single-channel conductivity of  $Kcv_{NTS}$  (ca. 140 pS for  $I_{true}$  at symmetrical 500 mM KCl in Fig. 2c in the linear range between -60 mV and +60 mV) argues for a large cytosolic opening with only little diffusion limitation<sup>3</sup>. Thus, it is likely that  $a_K$  in the channel’s cavity is equal to the cytosolic  $K^+$  activity. However, possible effects of diffusion from the cytosol to the cavity are of minor concern here, since they are included in the value of  $k_{12,1}$ . Corresponding considerations hold for  $k_{54}$ .

Here, we make only those transitions voltage-sensitive where two ions are moved simultaneously through the selectivity filter. The effect of voltage on the binding reactions is expected to be small, since 80% of the voltage is assumed to drop over the selectivity filter<sup>4,5,6</sup>.

$$k_{23} = k_{23,0} \exp(s_{23}V/V_{23}) \quad (S6a)$$

$$k_{32} = k_{32,0} \exp((s_{23} - 1)V/V_{23}) \quad (S6b)$$

and

$$k_{51} = k_{51,0} \exp(s_{51}V/V_{51}) \quad (S7a)$$

$$k_{15} = k_{15,0} \exp((s_{51} - 1)V/V_{51}) \quad (S7b)$$

$s_{ij}$  are the locations of the Eyring barriers and  $V_{ij}$  the characteristic voltages (causing an e-fold increase) of the respective state transitions. The rate constants with index “0” are the rate constants at 0 mV.

### Supplementary Table 1. The conversion of $K^+$ concentrations to activities $a_K$ .

**Supplementary Table S1.** Conversion of  $K^+$  concentrations to activities  $a_K$ <sup>7</sup>.

| $[K^+]/\text{mM}$ | 20 | 50 | 75 | 100 | 250 | 500 | 750 | 1000 | 1500 |
|-------------------|----|----|----|-----|-----|-----|-----|------|------|
| $a_K/\text{mM}$   | 17 | 41 | 59 | 77  | 175 | 324 | 465 | 602  | 872  |

### Supplementary Note 1: Choice of the current for fitting the IV curves, $I_{OF}$ or $I_{true}$

The probability for a transition from the open state O to the closed state M as given by  $k_{OM}$  depends on the ion occupation prior to this transition. Before a  $k_{OM}$  transition, the channel is not open all the time, but subject to O-F gating with much shorter dwell times than the inverse rate constant  $k_{OM}$  of 10 ms to 40  $\mu$ s. Thus, we can assume that the protein averages over the O-F gating with dwell times in the closed state between 1 and 5  $\mu$ s and a low occupation probability of 10-20%. Therefore, it seems plausible that the average current  $I_{OF}$  (Supplementary Eq. S1) determines the state of the protein modulating the O-M transition.

However, this conclusion needs some comments. First, a constant factor of all rate constants as introduced by a constant scaling factor of current in Eq. 1 or Supplementary Eq. S3 is canceled out in Eq. 4 for the  $P_m$ . Figure 2c shows that  $I_{OF}$  and  $I_{true}$  are nearly identical, and the difference results from a constant factor as caused by the negligible voltage dependence of  $k_{OF}$  and  $k_{FO}$  (Supplementary Eq. S1).

Second, the O-F gating implies that the  $P_m$  are different in the closed and open state. Thus, the protein averages over the effects of different  $P_m$  related to F and O. Since there is no current in the F-state, IV curve analysis cannot be used to determine the  $P_m$  in the state F. What can be done is a rough estimation. The gate for the O-F gating is very likely on the cytosolic side of S0. In the case of BK channels<sup>8</sup> and KCV<sub>PBCV-1</sub><sup>9</sup>, it was assumed that the S2 binding site was involved as indicated by MD-simulations<sup>10-12</sup> and crystal structure analysis<sup>13</sup>. An F-gate at the internal side of S0 implies that during its closure negative voltage cannot suck the ions away from S0. Thus, in the closed state F the ion concentration at S0 cannot change too much with voltage and is likely to be close to that at 0 mV.

Even if the above consideration is not completely correct, it has to be taken into account that the dwell time in state F is just 10 to 20% of the dwell time in the open state. Thus, any small errors in the above estimations locating the effective current somewhere between  $I_{OF}$  and  $I_{true}$  would be negligible in the light of the fact that  $k_{OM}$  changes by more than two orders of magnitude. Because of the above considerations,  $I_{OF}$  is adequate for the determination of the effective ion occupation from the IV curves, and it is also determined with higher accuracy than  $I_{true}$ <sup>14</sup>.

### Supplementary Note 2: Reliability of the global model-based fits

The global fits start from two different sets of the free model parameters in Fig. 5a. They are taken from the results of preliminary global fits in Origin® of the IV curves alone (Supplementary Eqs. 1 and S3) and of the  $P_m$  or  $1/P_m$  curves alone (Eq. 5a,b,  $m = 1, 2, 3, 4, 5$ ). The final global fit of all IV curves and  $k_{OM}$  curves together has been done in MATLAB resulting in the numerical values in Supplementary Table S2.

The reliability of the fits has been tested by attributing different relative weights to the IV curves and the  $\ln(k_{OM})$  curves with  $k_{OM} = w P_4/P_3$  (Eq. 6). Table S2 shows the values of the rate constants of ion hopping in the 5-state model in Fig. 5a<sup>1</sup> as obtained from averaging the results from 4 global fits with the relative weights of 0.5, 1, 3 and 10 of the  $k_{OM}$  curves. If the  $\ln(k_{OM})$  curves have a weight 0.3 as compared to the weighting factor 1 of the IV curves, the fit fails, noticeable by a complete lack of curve match for  $k_{OM}$  (not shown). The last column in Table S2 shows the value obtained for a weighting factor of 1.

The scatter factor (geometric mean) in Table S2 shows the error in the rate constants resulting from these different weights. Whereas nearly all parameters are very reliable,  $k_{12,1}$  and  $k_{21}$  are not well

determined. In tests,  $k_{12}$  and  $k_{21}$  were found to need a minimum value of  $100 (\mu\text{s}\cdot\text{mM})^{-1}$  and  $60000 (\mu\text{s})^{-1}$ , respectively, but much higher values also gave a good fit (not shown). Thus, their scatter factors are omitted in Table S2. However, for the calculation of the ion occupancies  $P_m$  (Eq. 4), only the ratio  $k_{12,1}/k_{21}$  is important, and this has an error of only 14% (last row in Supplementary Table S2).

**Supplementary Table S2.** Results of the global fit of the voltage and  $K^+$  dependence of current and of the rate constant of O-M channel closure ( $k_{OM}$ ) with the model in Fig. 5a. The geometric mean values are determined from four global fits with different weighting factors (0.5, 1, 3 and 10) adjusting the weight of the  $\ln(k_{OM})$  curves relative to the IV curves. The error is given as geometrical error (scatter factor, which gives the standard deviation as a factor) to ease the comparison between the different parameters. “calc” indicates that  $k_{21}$  is not a fit parameter as it can be calculated from micro reversibility at 1 mM  $K^+$  on either side and  $V = 0$  mV:  $k_{21} = k_{12,0} k_{23,0} k_{34} k_{45} k_{51,0} / (k_{32,0} k_{43} k_{54,0} k_{15,0})$ . The rate constants  $k_{12,1}$  and  $k_{21}$  are labelled by \*, because these values are not well determined. Only the ratio  $k_{12,1}/k_{21}$  (last row) is reliable. The last column gives the parameters of the global fit of current and  $\ln(k_{OM})$  with weighting factor 1. The corresponding curves of this fit are displayed in Fig. 6.

| parameter                  | Unit                              | Occurring in Equation | geometric mean | scatter factor | weighting factor 1 for Fig. 6 |
|----------------------------|-----------------------------------|-----------------------|----------------|----------------|-------------------------------|
| $k_{12,1} (\alpha_{Kin})$  | $\mu\text{s}^{-1} \text{mM}^{-1}$ | Eq. S5a               | 105*           |                | 127                           |
| $k_{21} (\text{calc})$     | $\mu\text{s}^{-1}$                | See Title             | 59768*         |                | 66600                         |
| $k_{23,0} (V)$             | $\mu\text{s}^{-1}$                | Eq. S6a               | 1214           | 1.08           | 1281                          |
| $k_{32,0} (V)$             | $\mu\text{s}^{-1}$                | Eq. S6b               | 1941           | 1.38           | 2418                          |
| $k_{34}$                   | $\mu\text{s}^{-1}$                | Eq. S3                | 252            | 1.12           | 274                           |
| $k_{43}$                   | $\mu\text{s}^{-1}$                | Eq. S3                | 685            | 1.21           | 613                           |
| $k_{45}$                   | $\mu\text{s}^{-1}$                | Eq. S3                | 6824           | 2.49           | 3658                          |
| $k_{54,1} (\alpha_{Kout})$ | $\mu\text{s}^{-1} \text{mM}^{-1}$ | Eq. S5b               | 35.4           | 2.07           | 22                            |
| $k_{51,0} (V)$             | $\mu\text{s}^{-1}$                | Eq. S7a               | 1694           | 1.04           | 1689                          |
| $k_{15,0} (V)$             | $\mu\text{s}^{-1}$                | Eq. S7b               | 132.6          | 1.05           | 129                           |
| $S_{23}$                   |                                   | Eq. S6                | 0.24           | 1.30           | 0.27                          |
| $V_{23}$                   | mV                                | Eq. S6                | 55.9           | 1.04           | 57                            |
| $S_{15}$                   |                                   | Eq. S7                | 0.40           | 1.11           | 0.37                          |
| $V_{15}$                   | mV                                | Eq. S7                | 44.9           | 1.06           | 43                            |
| $W$                        | $\mu\text{s}^{-1}$                | Eq. 7                 | 952            | 1.38           | 769                           |
| $k_{45}/k_{54,1}$          |                                   |                       | 193            | 1.21           | 170                           |
| $k_{12,1}/k_{21}$          |                                   |                       | 0.0018         | 1.14           | 0.0019                        |

The fits of the IV curves in Fig. 6 are very good. In the case of  $k_{OM}$ , the deviation of two data points at -160 mV with 50 mM internal KCl (green in Fig. 6e) is likely caused by the strong gating merging the closed peak and the open peak (similar to Fig. 3d), thus making the characteristics of the amplitude histogram less obvious to the fitting routine. A similar deviation is also found for varying the external concentration (Fig. 6f). However, the basic feature that the different curves merge at high negative voltages is clearly indicated by the theoretical and the measured curves, as discussed below. Nevertheless, fitting the  $k_{OM}$  curves with ion occupation probabilities other than  $P_4/P_3$  leads to worse fits as indicated by the error sums in Table 1 and by some typical examples (Supplementary Figs. S1 and S2).

**Supplementary Note 3: Typical examples for the failure of fits with other patterns of ion occupancies than  $P_4/P_3$  in the 5-state model of Fig. 5a**

Here, we show some typical global fits based on the 5-state model in Fig. 5a, which show that fits not using  $P_4/P_3$  for the  $k_{OM}$  curves cannot fit the data.

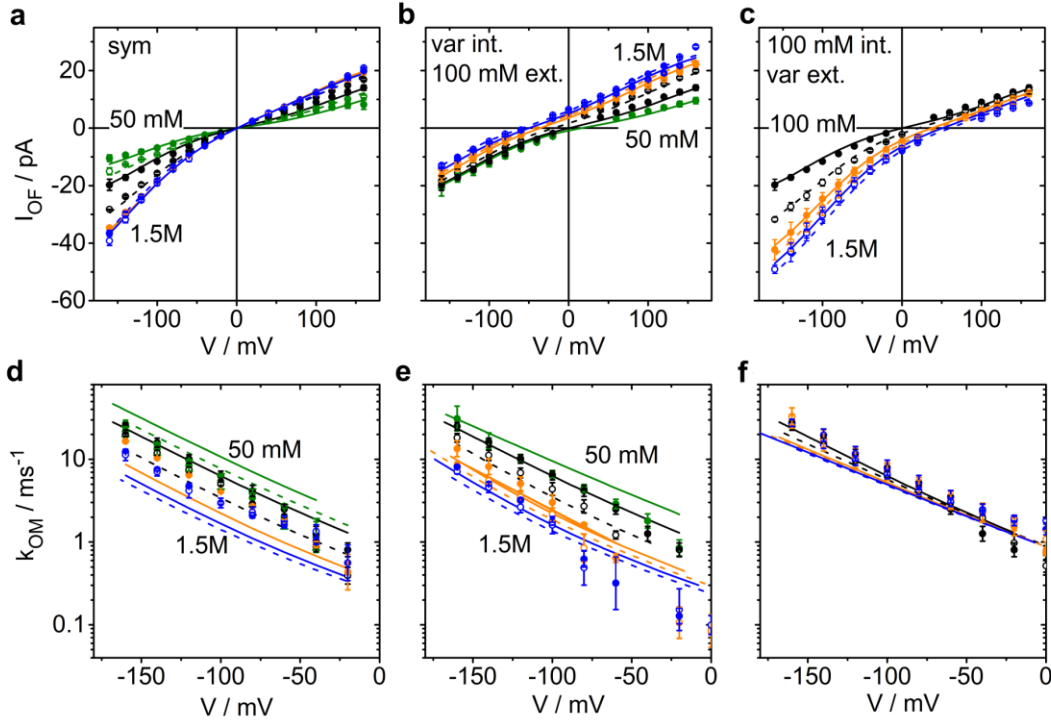

**Supplementary Figure S1.** The global fit of the IV curves and  $k_{OM} = w/P_3$  using the model in Fig. 5a<sup>1</sup>. For color legend and other details, see legend of Figure 6 in the main text.

The global fit of the IV curves with  $k_{OM}$  assigned to a single  $P_m$  results already in 60 graphs, because in each fit  $k_{OM}$  is assigned to a single  $P_m$  (the pattern ion concentration) out of those defined by the 10 equations of Eq. 5a,b ( $m = 1$  to 5) with KCl concentration being changed symmetrically or changed only on the external or the internal side. The number of graphs increases to 240 if we consider two partners as in  $P_4/P_3$ . Of course, we do not show all of them, but only three representatives for three different values of the error sum in Table 1 (Supplementary Figs. S1 and S2).

The fits shown in Supplementary Figs. S1 and S2 all yield reasonably good fits only of the IV curves. The global fit of current and  $k_{OM} = w/P_3$  (Supplementary Fig. S1) is the best fit obtained with a single pattern of ion distribution, namely  $1/P_3$ . The IV curves are fitted quite well, and the voltage dependence of  $k_{OM}$  is also reproduced. However, the dependence on  $K^+$  concentrations is poorly fitted by this hypothesis. This yields the necessity to include  $P_4$  (Eq. 6 and Fig. 6).

If  $k_{OM} = w/P_2$  is used, the voltage dependence of  $k_{OM}$  is too weak (Supplementary Fig. S2d). The worst case is obtained with  $k_{OM} = wP_1$  (Supplementary Fig. S2c). The examples in Supplementary Figs. S1 and S2 visualize the message of the error sums in Table 1, namely, that  $k_{OM} = wP_4/P_3$  (Eq. 6) is the only hypothesis, which is consistent with the measured data.

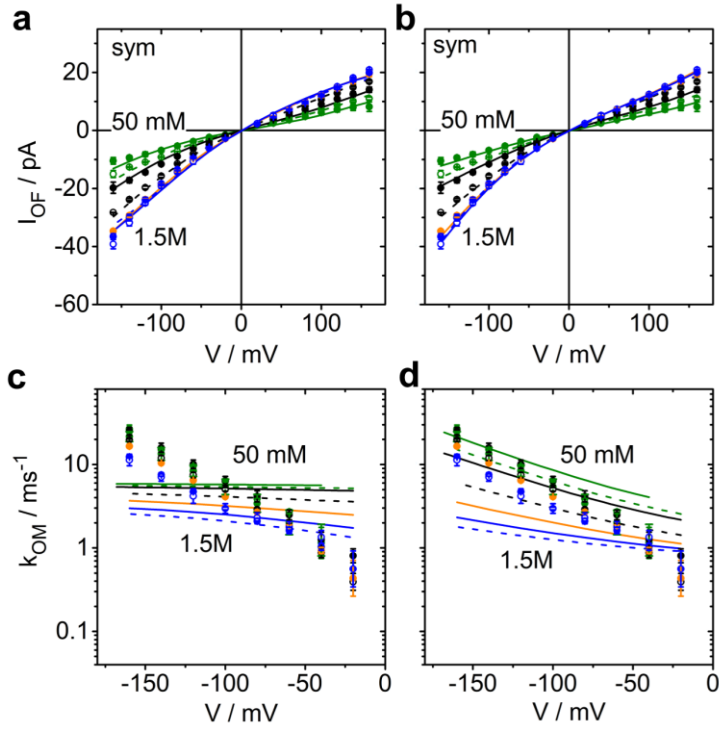

**Supplementary Figure S2.** Examples for the bad global fits of current and  $k_{OM}$  at symmetrical concentrations. **(a,c)** The global fit of the IV curves and  $k_{OM} = w \cdot P_1$  represents those with an error sum around 1000. **(b,d)** The global fit of the IV curves and  $k_{OM} = w/P_2$  represents those with an error sum around 550 (Table 1). For color legend and other details, see legend of Figure 6 in the main text.

**Supplementary Note 4: Numerical peculiarities resulting in the dependence of  $k_{OM}$  on  $Kmf$  (voltage minus Nernst potential) in Fig. 4e**

In Fig. 4e of the main text, it is shown that  $k_{OM}$  at negative voltages depends on the “K<sup>+</sup> motive force” ( $Kmf = V - E_K$ ) only when internal K<sup>+</sup> concentration is varied. In order to understand how this is predicted by our model (Eq. 6) in quantitative terms, we inspect the dominant terms in the matrices  $D_4^{CS}$  and  $D_3^{CS}$ . In Supplementary Eq. S8, the values for the rate constants are given at  $V = -100$  mV,  $a_{kin} = 602$  mM, (i.e.  $[K^+]_{in} = 1000$  mM) and  $a_{kout} = 77$  mM (i.e.  $[K^+]_{out} = 100$  mM). Supplementary Equation S8 is written as a modified arrow scheme<sup>2</sup> (Eq. S4): Arrows have been replaced by the respective values of the rate constants or with other words: the numbers are the rate constants between the states given in the top line with  $k_{left,right}$  above the diagonal and  $k_{right,left}$  below the diagonal. The originally empty diagonals of the arrow scheme (Supplementary Eq. S4) are replaced by “1”. The columns “product” contain the products of rate constants in the respective rows.

$$\frac{D_4^{CS}}{D_3^{CS}} = \frac{\begin{bmatrix} & & & 4 & 5 & 1 & 2 & 3 & 4 \\ & & & & 1 & 695 & 63210 & 790 & 252 \\ & & & & 2726 & 1 & 63210 & 790 & 252 \\ & & & & 2726 & 501 & 1 & 790 & 252 \\ & & & & 2726 & 501 & 59786 & 1 & 252 \\ & & & & 2726 & 501 & 59786 & 7563 & 1 \end{bmatrix}}{\begin{bmatrix} 3 & 4 & 5 & 1 & 2 & 3 \\ & 1 & 6824 & 251 & 63210 & 790 \\ 685 & & 1 & 251 & 63210 & 790 \\ 685 & 2726 & & 1 & 63210 & 790 \\ 685 & 2726 & 501 & & 1 & 790 \\ 685 & 2726 & 501 & 59786 & & 1 \end{bmatrix}} = \begin{bmatrix} \text{product} \\ 8.7E+12 \\ 3.4E+13 \\ 2.7E+11 \\ 2.0E+13 \\ 6.2E+14 \end{bmatrix} \quad \text{(S8)}$$

Rate constants printed in black are constant. Voltage dependence is indicated in red (increasing with positive voltage) and in blue (increasing with negative voltage). Green rate constants include the external (77 mM) and magenta rate constants the internal (602 mM) K<sup>+</sup> activity, respectively.

The fifth row is the dominant row in  $D_4^{c5}$  as indicated by the values of the products on the right-hand side of the equation. It is of the type  $constant \cdot \exp[(s_{51}-1)V/V_{51} + (s_{23}-1)V/V_{23}]$ .  $a_{Kout}$  (green) is included in the constant factor because it is kept constant when internal K<sup>+</sup> concentrations is varied. The dominant terms of  $D_3^{c5}$  are the rows 1 and 3. Thus,  $P_3/P_4$  can be approximated by

$$\begin{aligned} \frac{P4}{P3} &\approx \frac{k_{54}k_{15}k_{21}k_{32}}{k_{45}k_{51}k_{12}k_{23} + k_{43}k_{54}k_{12}k_{23}} \\ &= \frac{k_{54}k_{15,0}k_{21}k_{32,0} \exp((s_{51}-1)V/V_{51}) \exp((s_{23}-1)V/V_{23})}{[k_{45}k_{51,0} \exp(s_{51}V/V_{51}) + k_{43}k_{54}] \cdot a_{Kin} k_{12,1}k_{23,0} \exp(s_{23}V/V_{23})} \end{aligned} \quad (S9)$$

After extraction of the dependence on V and  $a_{Kin}$ , all terms in Supplementary Eq. S9 of the type  $k_{ij}$  and  $k_{ij,x}$  (x = 0 or 1) are constant. For the sake of clarity, they are comprised in  $const_n$ ,  $const_{d2}$  and  $const_{d1}$  as defined by the comparison of Supplementary Eqs. S9 and S10

$$\begin{aligned} \frac{P4}{P3} &\approx \frac{const_n \exp[(s_{51}-1)V/V_{51}] \exp[(s_{23}-1)V/V_{23}]}{const_{d1} a_{Kin} \exp[s_{51}V/V_{51}] \exp[s_{23}V/V_{23}] + const_{d2} a_{Kin} \exp[s_{23}V/V_{23}]} \\ &= \frac{const_n}{const_{d1} a_{Kin} \exp[V(1/V_{51} + 1/V_{23})] + const_{d2} a_{Kin} \exp[V((1-s_{51})/V_{51} + 1/V_{23})]} \end{aligned} \quad (S10)$$

Because the dependence on  $Kmf$  is only observed when  $a_{Kout}$  is constant and only  $a_{Kin}$  is varied, we take it out of the constant factors to formally introduce the Nernst potential  $E_K$

$$\begin{aligned} \frac{P4}{P3} &\approx \frac{const_n}{const_{d1}^* a_{Kout} \frac{a_{Kin}}{a_{Kout}} \exp[V(1/V_{51} + 1/V_{23})] + const_{d2}^* a_{Kout} \frac{a_{Kin}}{a_{Kout}} \exp[V((1-s_{51})/V_{51} + 1/V_{23})]} \end{aligned} \quad (S11)$$

$$E_K = \frac{RT}{F} \ln \frac{a_{Kout}}{a_{Kin}} \quad (S12)$$

With the new constant  $const = const_n/const_{d2}$  and introducing the Nernst potential  $E_K$  (Supplementary Eq. S12), Supplementary Eq. S11 is converted to the  $Kmf$  (K<sup>+</sup>-motive force or chemiosmotic potential = V -  $E_K$ ) form

$$\frac{P_4}{P_3} \approx \frac{\text{const}}{\frac{\text{const}_{d1}}{\text{const}_{d2}} \exp[V(1/V_{15} + 1/V_{23}) - E_K] + \exp[V((1-s_{15})/V_{15} + 1/V_{23} - E_K)]} \quad (\text{S13})$$

$$= \frac{\text{const}}{\frac{\text{const}_{d1}}{\text{const}_{d2}} \cdot \exp[Kmf_1] + \exp[Kmf_2]}$$

Supplementary Equation S13 shows that in the exponential functions there is a sum of  $-E_K$  (Supplementary Eq. S12) and a fraction of the voltage, as determined by  $s$ . This is the basis for the dependency on the  $KmF$ , which holds in the case of varying internal  $[K^+]$  as found in the inset of Fig. 4e. There are some deviations from a strict dependence on  $KmF$ , because in Supplementary Eq. S13 two slightly different  $KmFs$  are involved, and because the smaller terms in Supplementary Eq. S8 are ignored. Nevertheless, the good fit in Fig. 6e shows that the dependence on  $Kmf$  is a good approximation, and that it originates from the factor  $P_4/P_3$ .

#### Supplementary Note 5: The absence of an effect of external $K^+$ concentration even though the sensor S0 is at the outside

The absence of an effect of external  $K^+$  concentration on  $k_{OM}$  (Fig. 4f) at negative voltages comes as a surprise because S0 seems to be the voltage sensor being close to the outside concentration. This can be explained by an inspection of the pattern of ion occupations  $P_3$  and  $P_4$  in Fig. 7 suggesting a mutual compensation of the sensitivity of  $P_3$  and  $P_4$  to external  $K^+$ . Here, it is explained in quantitative terms. In Supplementary Eq. S14, the values for the rate constants are given at  $V = -100$  mV,  $a_{Kin} = 77$  mM i.e.  $[K_{in}] = 100$  mM and  $a_{Kout} = 602$  mM i.e.  $[K_{out}] = 1000$  mM.

$$\frac{D_4^{CS}}{D_3^{CS}} = \frac{\begin{bmatrix} & 4 & 5 & 1 & 2 & 3 & 4 \\ & & 1 & 695 & 8085 & 790 & 252 \\ & 21311 & & 1 & 8085 & 790 & 252 \\ & 21311 & & 501 & & 1 & 790 \\ & 21311 & & 501 & 59786 & & 1 \\ & 21311 & & 501 & 59786 & 7563 & 1 \end{bmatrix}}{\begin{bmatrix} 3 & 4 & 5 & 1 & 2 & 3 \\ & 1 & 6824 & 251 & 8085 & 790 \\ 685 & & 1 & 251 & 8085 & 790 \\ 685 & 21311 & & 1 & 8085 & 790 \\ 685 & 21311 & & 501 & & 1 \\ 685 & 21311 & & 501 & 59786 & 1 \end{bmatrix}} = \frac{\begin{bmatrix} \text{product} \\ 1.2E+12 \\ 3.4E+13 \\ 2.2E+12 \\ 1.6E+14 \\ 4.9E+15 \end{bmatrix}}{\begin{bmatrix} \text{product} \\ 3.0E+13 \\ 3.0E+12 \\ 9.3E+13 \\ 5.8E+12 \\ 4.4E+14 \end{bmatrix}} \quad (\text{S14})$$

The scheme in Supplementary Eq. S14 shows that in the dominant terms the rate constant  $k_{45} = k_{45,1} a_{Kout}$  (green) occurs as a common factor in the numerator and in the denominator. Thus,  $a_{Kout}$  is canceled out in the dominant terms. This explains the much smaller influence of  $a_{Kout}$  on  $k_{OM}$  as compared to  $a_{Kin}$  as shown in Figs. 4f and 6f.



**Supplementary Note 6: Global fits with the 4-state model of ion-hopping in Fig. 5b**

Reducing the 5-state model in Fig. 5a<sup>1</sup> to the 4-state model in Fig. 5b leads to the omission of state 4 in Fig. 5a. The equations are nearly the same as for Fig. 5a with the exception that the rate constants between state 3 and 4 are omitted. Thus,  $k_{34}$  and  $k_{43}$  in the 4-state model take over the function of  $k_{45}$  and  $k_{54}$  of the 5-state model.

Similar to the 5-state model, the global fit of the IV curves and of  $\ln(w/P_3)$  is the only fit providing the voltage dependence of the rate constant  $k_{OM}$  (Supplementary Fig. S3). However, there is no candidate such as  $P_4$  in the 5-state model, which can account for the dependence on  $K^+$  concentration.

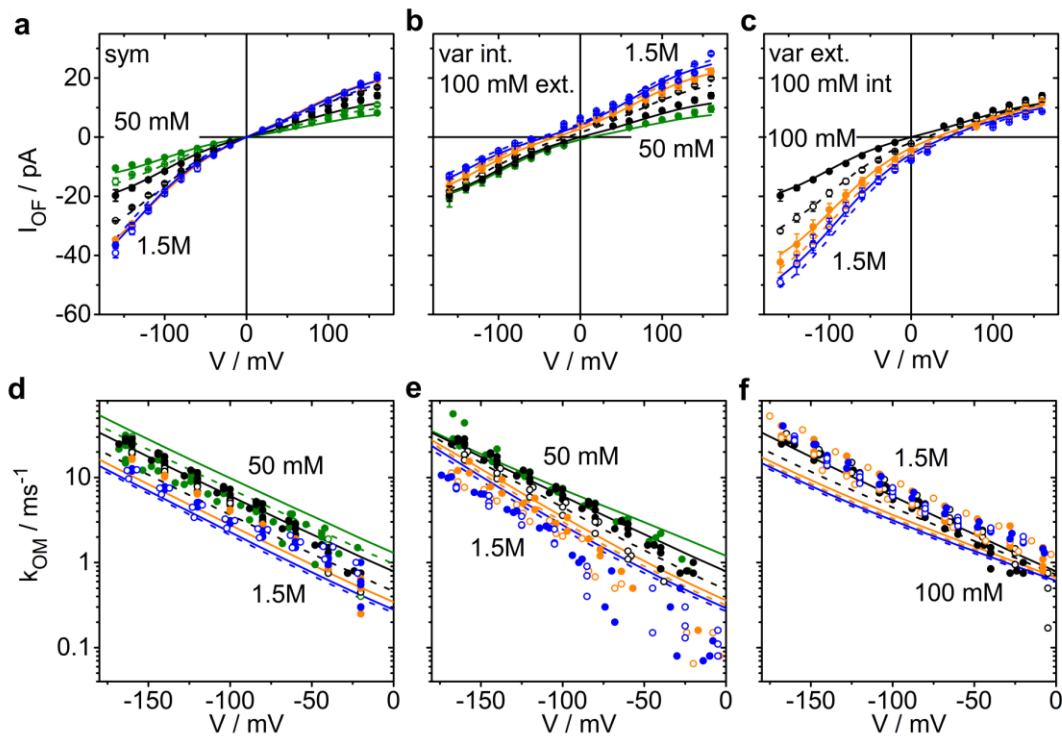

**Supplementary Figure S3.** The best global fit of the IV curves and  $k_{OM}$  (with  $\ln(w/P_3)$ ) in Fig.4 on the basis of the 4-state model in Fig. 5b. For color legend and other details, see legend of Figure 6 in the main text.

## Supplementary Note 7: Global fits with the hard knock-on model

The equation for the current in the hard knock-on model of Fig. 5c is the same as Supplementary Eq. S3, but the equations for the individual rate constants are adapted to this model with:

$$k_{12} = k_{12,1} \cdot a_{Kin} \quad (S15a)$$

$$k_{43} = k_{43,1} \cdot a_{Kout} \quad (S15b)$$

$$k_{45} = k_{45,0} \exp(s_{45} V / V_{45}) \quad (S16a)$$

$$k_{54} = k_{54,0} \exp((s_{45} - 1) V / V_{45}) \quad (S16b)$$

$$k_{51} = k_{51,0} \exp(s_{51} V / V_{51}) \quad (S17a)$$

$$k_{15} = k_{15,0} \exp((s_{51} - 1) V / V_{51}) \quad (S17b)$$

Supplementary Figs. S4 and S5 show global fits of the IV curves and rate constant  $k_{OM}(V)$  (Fig. 4) on the basis of the model in Fig. 5c. The general problem is that the fits of the IV curves are quite good (Supplementary Fig. S4a to c), but the steepness of the voltage-dependence of  $k_{OM}$  is by far not reached (Supplementary Fig. S5d to f). Supplementary Fig. S4a to f shows the “best” fit result in a global fit of the IV curves and  $\ln(1/P_5)$ .

At least the rough trend of this  $K^+$  dependence (direction and difference between internal and external concentration) could be modelled in a global fit of the IV curves and  $\ln(1/P_2)$ . Again, the fit of the IV curves is not distinguishable from that in Fig. 6a to c, but the steepness of the voltage-dependency of  $k_{OM}$  (Supplementary Fig. S5d to f) is even worse than that in Supplementary Fig. S4d to f.

However, the message of these fits is that the hard-knock on model completely fails to explain the voltage and  $K^+$  dependency of  $k_{OM}$  by means of voltage-dependent ion occupation in the selectivity filter.

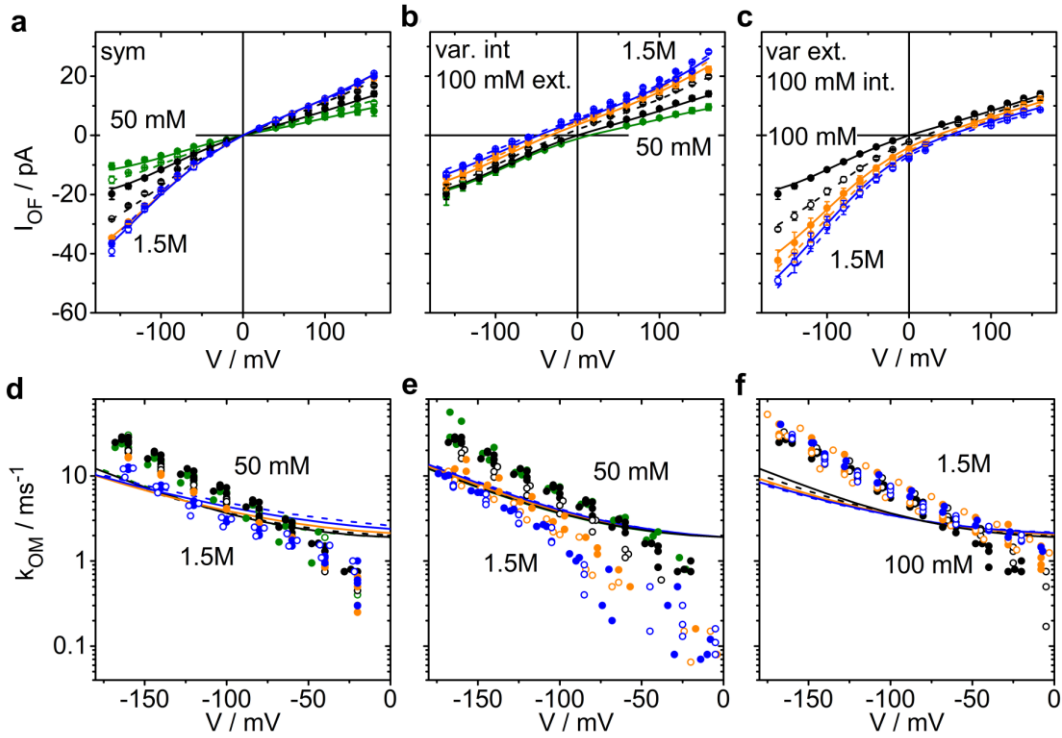

**Supplementary Figure S4.** Best fit for a single occupation state for the hard-knock on model (Fig. 5c).  $k_{OM}$  was fitted with  $w/P_5$ . For color legend and other details, see legend of Figure 6 in the main text.

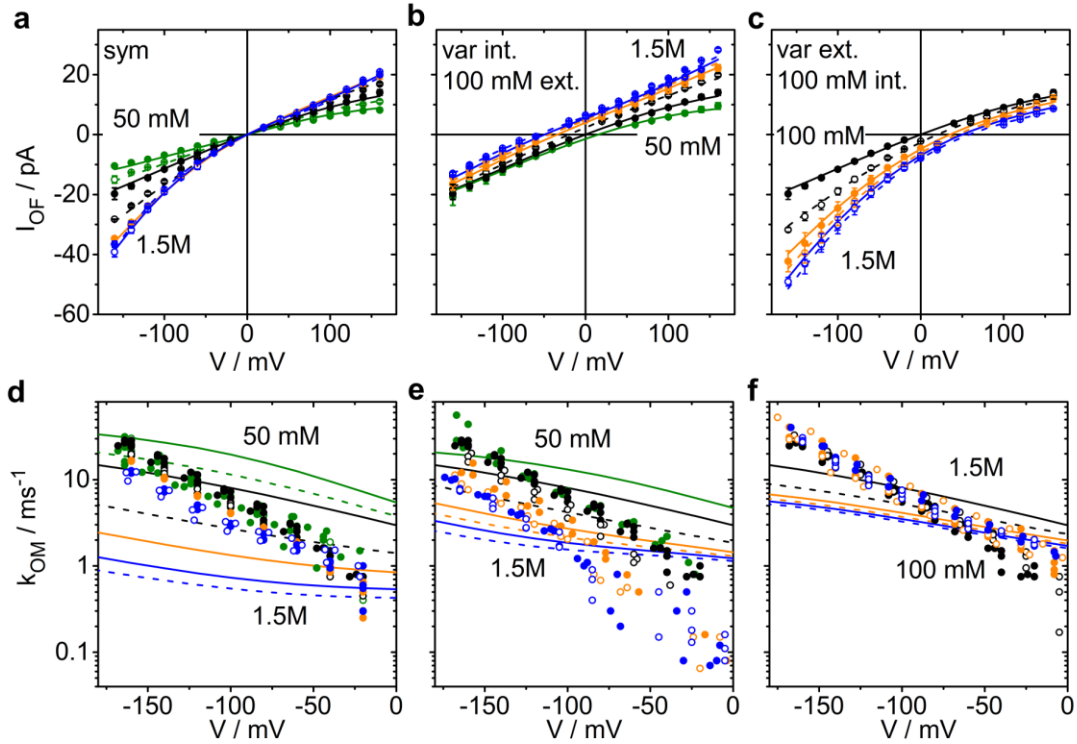

**Supplementary Figure S5.** Another fit for a single occupation state for the hard-knock on model (Fig. 5c).  $k_{OM}$  was fitted with  $w/P_2$ . Not more than a rough trend of the  $K^+$  dependence could be achieved. For color legend and other details, see legend of Figure 6 in the main text.

### Supplementary Note 8: The lab-made program bownhill.exe

The program bownhill.exe, the auxiliary files and a help-file can be downloaded from <http://www.bio.tu-darmstadt.de/ag/professuren/indraschroeder/software.en.jsp> together with the data for a demonstrative run.

### Supplementary Figure S6: The flow diagram of the global fit

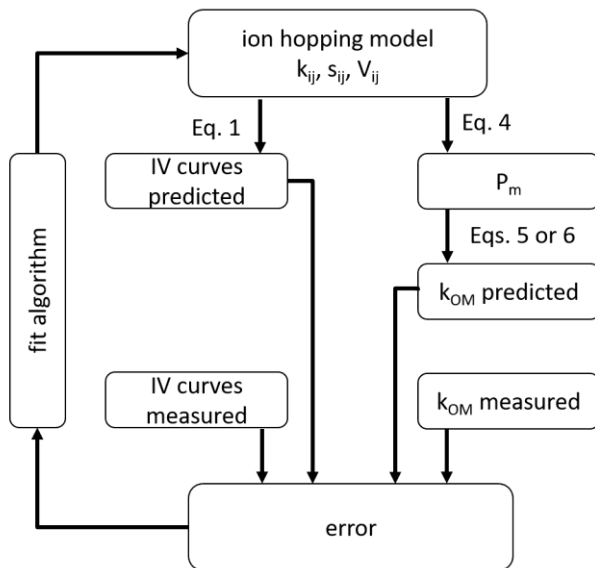

## Supporting References

1. Roux, B. Ion conduction and selectivity in K<sup>+</sup> channels. *Annu. Rev. Biophys. Biomol. Struct.* **34**, 153–171 (2005).
2. Hansen, U.-P., Rauh, O. & Schroeder, I. A simple recipe for setting up the flux equations of cyclic and linear reaction schemes of ion transport with a high number of states: the arrow scheme. *Channels* **10**, 1–20 (2016).
3. Naranjo, D., Moldenhauer, H., Pincuntureo, M. & Díaz-Franulic, I. Pore size matters for potassium channel conductance. *J. Gen. Physiol.* **148**, 277–291 (2016).
4. Jiang, Y. *et al.* The open pore conformation of potassium channels. *Nature* **417**, 523–546 (2002).
5. Contreras, J. E. *et al.* Voltage profile along the permeation pathway of an open channel. *Biophys. J.* **99**, 2863–2869 (2010).
6. Andersson, A. E. V., Kasimova, M. A. & Delemotte, L. Exploring the viral channel Kcv<sub>PBCV-1</sub> function via computation. *J. Membr. Biol.* **in press**, (2018).
7. Hamer, W. J. & Wu, Y.-C. Osmotic coefficients and mean activity coefficients of uni-univalent electrolytes in water at 25°C. *J. Phys. Chem. Ref. Data* **1**, 1047–1100 (1972).
8. Schroeder, I. & Hansen, U.-P. Saturation and microsecond gating of current indicate depletion-induced instability of the MaxiK selectivity filter. *J. Gen. Physiol.* **130**, 83–97 (2007).
9. Abenavoli, A. *et al.* Fast and slow gating are inherent properties of the pore module of the K<sup>+</sup> channel Kcv. *J. Gen. Physiol.* **134**, 219–229 (2009).
10. Bernèche, S. & Roux, B. A gate in the selectivity filter of potassium channels. *Structure* **13**, 591–600 (2005).
11. Capener, C. E., Proks, P., Ashcroft, F. M. & Sansom, M. S. P. Filter flexibility in a mammalian K channel: models and simulations of Kir6.2 mutants. *Biophys. J.* **84**, 2345–2356 (2003).
12. Miloshevsky, G. V & Jordan, P. C. Conformational changes in the selectivity filter of the open-state KcsA channel: an energy minimization study. *Biophys. J.* **95**, 3239–3251 (2008).
13. Zhou, Y., Morais-Cabral, J. H., Kaufman, A. & MacKinnon, R. Chemistry of ion coordination and hydration revealed by a K<sup>+</sup> channel-Fab complex at 2.0 Å resolution. *Nature* **414**, 43–48 (2001).
14. Rauh, O. *et al.* Extended beta distributions open the access to fast gating in bilayer experiments-assigning the voltage-dependent gating to the selectivity filter. *FEBS Lett.* **591**, 3850–3860 (2017).
